# Supplementary material for: Dissecting Stemness in Aggressive Intracranial Meningiomas: Prognostic Role of SOX2 Expression
Source: MDPI journal article supplement (doi:10.3390/ijms231911690), 2022-10-02
Supplement: s1 [file s1]

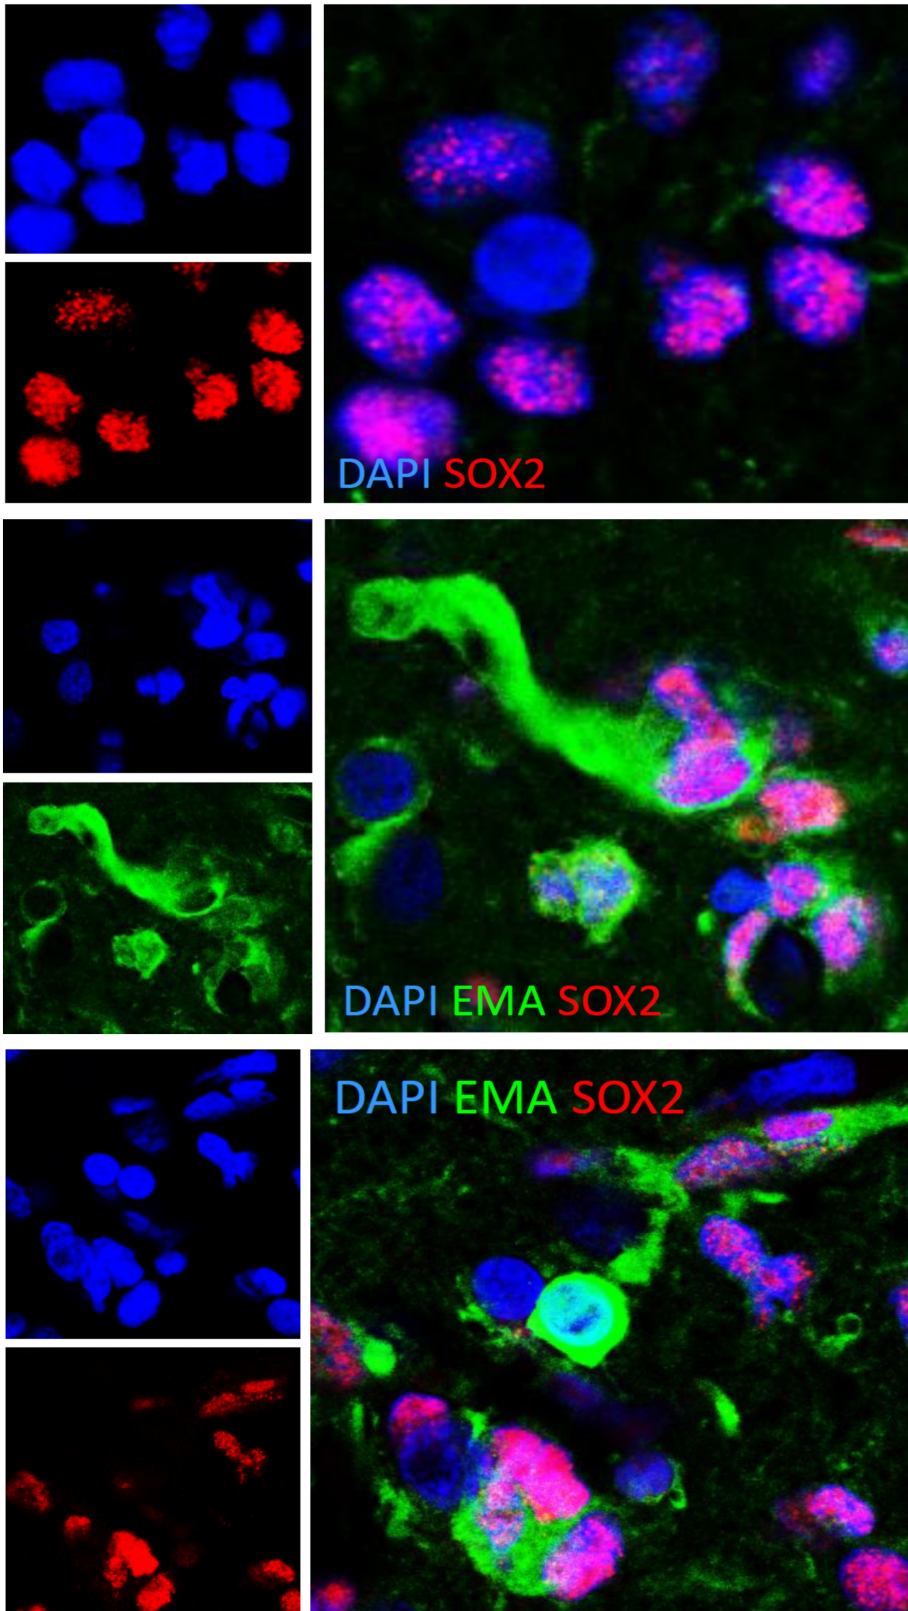

### Supplementary Figure S1. Immunofluorescence for SOX2.

*Upper row.* Microphotograph showing an atypical meningioma (grade 2) after nuclear staining with DAPI (blue). SOX2 (red) localizes in the cell nuclei. Original magnification 40x. *Middle row.* Microphotograph showing an anaplastic meningioma (grade 3) after staining with anti-SOX2 antibody (red) and with the antibody against the epithelial membrane antigen (EMA), a cell marker for meningioma (green). Most of the tumor cells express SOX2 in their nuclei (DAPI, blue). Original magnification 40x. *Lower row.* Microphotograph showing an anaplastic meningioma (grade III). Some tumor cells have lost their EMA expression as de-differentiation process. Original magnification 40x.
