# Supplementary material for: Dissecting Stemness in Aggressive Intracranial Meningiomas: Prognostic Role of SOX2 Expression
Source: MDPI journal article supplement (doi:10.3390/ijms231911690), 2022-10-02
Supplement: s1 [file s1]

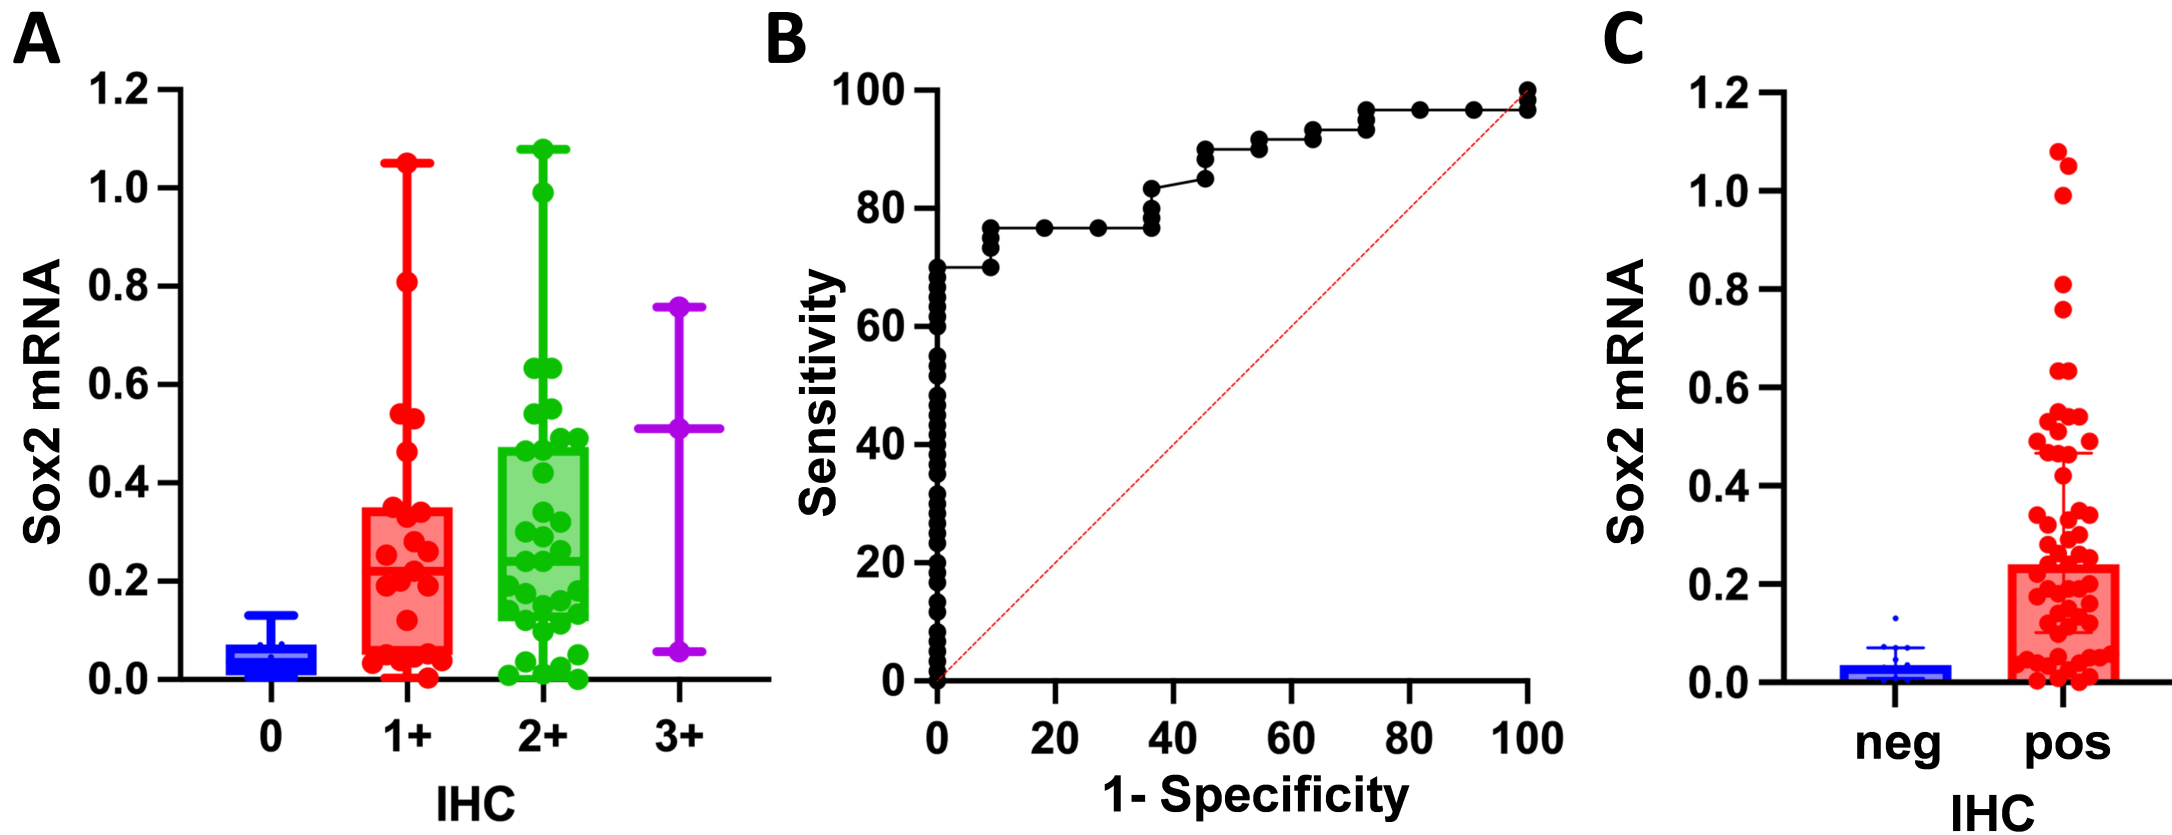

**Supplementary Figure S2. SOX2 assessment using IHC and RT-qPCR.** A, Box plot showing the correlation between SOX2 IHC expression and SOX2 mRNA levels measured with RT-PCR. B, ROC curve assessing the accuracy of RT-qPCR mRNA quantification in predicting IHC positivity. C, Box plot showing the different SOX2 mRNA levels between positive and negative cases at IHC (\*\*\*,  $p < 0.001$ ).
